# Supplementary material
Source: PubMed Central journal article supplement (PMC4817561)
Supplement: Supp_Table1.pdf [file Supp_Table1.pdf]

## Supplementary Data

SUPPLEMENTARY TABLE S1. SUBTYPES, CIRCULATING RECOMBINANT FORM, AND UNIQUE RECOMBINANT FORMS, IDENTIFIED IN THE *GAG* AND *POL* REGIONS OF HIV-1 MEDICAL DIAGNOSTIC CENTER SUBJECTS FROM YAOUNDÉ, CAMEROON

| <i>Subject ID</i> | <i>Timepoint</i> | <i>gag</i> | <i>pol</i> | <i>Genotype</i> |
|-------------------|------------------|------------|------------|-----------------|
| MDC001            | 1                | CRF18_cpx  | CRF18_cpx  | CRF18_cpx       |
|                   | 2                | CRF18_cpx  | CRF18_cpx  |                 |
|                   | 4                | CRF18_cpx  | CRF18_cpx  |                 |
|                   | 5                | CRF18_cpx  | NA         |                 |
| MDC002            | 1                | CRF02_AG   | CRF02_AG   | CRF02_AG        |
|                   | 2                | CRF02_AG   | CRF02_AG   |                 |
|                   | 4                | CRF02_AG   | NA         |                 |
| MDC003            | 1                | D          | D          | D               |
| MDC004            | 1                | CRF02_AG   | CRF02_AG   | CRF02_AG        |
|                   | 2                | CRF02_AG   | NA         |                 |
| MDC006            | 1                | A1         | CRF02_AG   | URF             |
|                   | 2                | NA         | CRF02_AG   |                 |
|                   | 3                | NA         | CRF02_AG   |                 |
| MDC007            | 1                | CRF02_AG   | CRF02_AG   | CRF02_AG        |
| MDC008            | 1                | CRF02_AG   | CRF02_AG   | CRF02_AG        |
|                   | 2                | CRF02_AG   | CRF02_AG   |                 |
| MDC011            | 1                | CRF02_AG   | CRF02_AG   | CRF02_AG        |
| MDC012            | 1                | CRF02_AG   | CRF02_AG   | CRF02_AG        |
|                   | 2                | CRF02_AG   | CRF02_AG   |                 |
|                   | 3                | CRF02_AG   | CRF02_AG   |                 |
| MDC014            | 1                | A1         | NA         | A1              |
| MDC017            | 2                | CRF02_AG   | NA         | CRF02_AG        |
| MDC018            | 1                | CRF02_AG   | CRF02_AG   | CRF02_AG        |
|                   | 2                | CRF02_AG   | CRF02_AG   |                 |
| MDC019            | 1                | CRF22_01A1 | CRF22_01A1 | CRF22_01A1      |
| MDC023            | 1                | CRF22_01A1 | CRF22_01A1 | CRF22_01A1      |
|                   | 2                | CRF22_01A1 | NA         |                 |
|                   | 3                | CRF22_01A1 | NA         |                 |
| MDC025            | 1                | CRF02_AG   | NA         | CRF02_AG        |
|                   | 2                | CRF02_AG   | NA         |                 |
| MDC026            | 1                | CRF02_AG   | CRF02_AG   | CRF02_AG        |
|                   | 2                | CRF02_AG   | CRF02_AG   |                 |
| MDC029            | 1                | D          | D          | D               |
| MDC030            | 1                | NA         | H          | H               |
| MDC037            | 1                | CRF02_AG   | CRF02_AG   | CRF02_AG        |
|                   | 2                | CRF02_AG   | NA         |                 |
| MDC038            | 1                | CRF02_AG   | CRF02_AG   | CRF02_AG        |
| MDC040            | 1                | CRF02_AG   | CRF02_AG   | CRF02_AG        |
|                   | 2                | CRF02_AG   | CRF02_AG   |                 |
| MDC044            | 1                | CRF02_AG   | CRF02_AG   | CRF02_AG        |
|                   | 2                | CRF02_AG   | CRF02_AG   |                 |
|                   | 3                | CRF02_AG   | CRF02_AG   |                 |
| <b>deleted</b>    |                  |            |            |                 |
| MDC045            | 1                | CRF02_AG   | CRF02_AG   | CRF02_AG        |
|                   | 2                | CRF02_AG   | CRF02_AG   |                 |
|                   | 3                | CRF02_AG   | NA         |                 |
|                   | 4                | CRF02_AG   | NA         |                 |
| MDC047            | 1                | CRF02_AG   | CRF02_AG   | CRF02_AG        |
|                   | 2                | CRF02_AG   | CRF02_AG   |                 |
| MDC048            | 2                | G          | NA         | G               |
|                   | 3                | G          | NA         |                 |
| MDC052            | 1                | CRF02_AG   | NA         | CRF02_AG        |
|                   | 2                | CRF02_AG   | NA         |                 |
|                   | 3                | CRF02_AG   | NA         |                 |
| MDC053            | 3                | CRF18_cpx  | NA         | CRF18_cpx       |
| MDC057            | 3                | NA         | CRF02_AG   | CRF02_AG        |
| MDC059            | 1                | NA         | CRF02_AG   | CRF02_AG        |

(continued)

SUPPLEMENTARY TABLE S1 (CONTINUED)

| <i>Subject ID</i> | <i>Timepoint</i> | <i>gag</i> | <i>pol</i> | <i>Genotype</i> |
|-------------------|------------------|------------|------------|-----------------|
| MDC060            | 1                | CRF22_01A1 | CRF22_01A1 | CRF22_01A1      |
|                   | 2                | CRF22_01A1 | CRF22_01A1 |                 |
| MDC066            | 2                | CRF02_AG   | NA         | CRF02_AG        |
| MDC068            | 1                | CRF02_AG   | NA         | CRF02_AG        |
|                   | 3                | CRF02_AG   | CRF02_AG   |                 |
| MDC072            | 1                | CRF02_AG   | NA         | CRF02_AG        |
| MDC075            | 1                | D          | D          | D               |
|                   | 2                | D          | D          |                 |
| MDC079            | 1                | CRF02_AG   | CRF02_AG   | CRF02_AG        |
| MDC080            | 1                | G          | G          | G               |
| MDC081            | 1                | CRF02_AG   | CRF02_AG   | CRF02_AG        |
| MDC086            | 1                | CRF02_AG   | CRF02_AG   | CRF02_AG        |
|                   | 2                | CRF02_AG   | NA         |                 |
| MDC091            | 1                | CRF02_AG   | NA         | CRF02_AG        |
| MDC092            | 1                | D          | NA         | D               |
| MDC093            | 1                | CRF02_AG   | NA         | CRF02_AG        |
|                   | 2                | CRF02_AG   | CRF02_AG   |                 |
|                   | 3                | CRF02_AG   | NA         |                 |
| MDC098            | 1                | CRF02_AG   | CRF02_AG   | CRF02_AG        |
|                   | 2                | CRF02_AG   | CRF02_AG   |                 |
|                   | 3                | CRF02_AG   | CRF02_AG   |                 |
| MDC100            | 1                | CRF02_AG   | CRF02_AG   | CRF02_AG        |
|                   | 2                | CRF02_AG   | CRF02_AG   |                 |
|                   | 3                | CRF02_AG   | CRF02_AG   |                 |
| MDC102            | 1                | CRF02_AG   | NA         | CRF02_AG        |
|                   | 2                | CRF02_AG   | CRF02_AG   |                 |
|                   | 3                | CRF02_AG   | NA         |                 |
| MDC103            | 1                | CRF13_cpx  | NA         | CRF13_cpx       |
| MDC116            | 1                | CRF02_AG   | CRF02_AG   | CRF02_AG        |
| MDC117            | 3                | A2         | NA         | A2              |
| MDC125            | 1                | CRF02_AG   | CRF02_AG   | CRF02_AG        |
| MDC128            | 1                | NA         | G          | G               |
|                   | 3                | G          | NA         |                 |
| MDC131            | 1                | CRF02_AG   | CRF02_AG   | CRF02_AG        |
|                   | 2                | CRF02_AG   | CRF02_AG   |                 |
|                   | 3                | CRF02_AG   | F2         | URF             |
| MDC135            | 1                | CRF02_AG   | CRF02_AG   | CRF02_AG        |
| MDC142            | 2                | CRF22_01A1 | CRF22_01A1 | CRF22_01A1      |
| MDC143            | 1                | CRF02_AG   | CRF02_AG   | CRF02_AG        |
| MDC153            | 1                | CRF02_AG   | CRF02_AG   | CRF02_AG        |
|                   | 2                | CRF02_AG   | CRF02_AG   |                 |
| MDC157            | 1                | CRF02_AG   | NA         | CRF02_AG        |
| MDC162            | 1                | CRF13_cpx  | CRF13_cpx  | CRF13_cpx       |
|                   | 2                | CRF13_cpx  | CRF13_cpx  |                 |
| MDC163            | 1                | NA         | CRF11_cpx  | CRF11_cpx       |
| MDC164            | 1                | F2         | F2         | F2              |
|                   | 2                | F2         | F2         |                 |
|                   | 3                | F2         | NA         |                 |
| MDC166            | 1                | CRF02_AG   | CRF02_AG   | CRF02_AG        |
| MDC167            | 1                | NA         | CRF02_AG   | CRF02_AG        |
| MDC172            | 1                | CRF37_cpx  | CRF37_cpx  | CRF37_cpx       |
|                   | 2                | CRF37_cpx  | CRF37_cpx  |                 |
|                   | 3                | CRF37_cpx  | CRF37_cpx  |                 |
| MDC174            | 1                | CRF02_AG   | NA         | CRF02_AG        |
| MDC179            | 1                | CRF02_AG   | F2         | URF             |
|                   | 2                | CRF02_AG   | F2         |                 |

(continued)

SUPPLEMENTARY TABLE S1 (CONTINUED)

| <i>Subject ID</i> | <i>Timepoint</i> | <i>gag</i> | <i>pol</i> | <i>Genotype</i>   |
|-------------------|------------------|------------|------------|-------------------|
| MDC182            | 1                | CRF18_cpx  | CRF18_cpx  | CRF18_cpx         |
| MDC187            | 1                | CRF02_AG   | CRF02_AG   | CRF02_AG          |
|                   | 2                | CRF02_AG   | CRF02_AG   |                   |
| MDC189            | 1                | CRF02_AG   | CRF02_AG   | CRF02_AG          |
|                   | 2                | CRF02_AG   | CRF02_AG   |                   |
| MDC190            | 1                | CRF37_cpx  | NA         | CRF37_cpx         |
| MDC192            | 1                | CRF02_AG   | CRF02_AG   | CRF02_AG          |
|                   | 2                | CRF02_AG   | CRF02_AG   |                   |
|                   | 3                | CRF02_AG   | NA         |                   |
| MDC195            | 2                | NA         | CRF37_cpx  | CRF37_cpx         |
|                   | 3                | CRF37_cpx  | NA         |                   |
| MDC199            | 1                | F2         | NA         | F2                |
| MDC200            | 1                | F2         | NA         | F2                |
|                   | 2                | F2         | NA         |                   |
| MDC202            | 3                | CRF02_AG   | NA         | CRF02_AG          |
| MDC209            | 1                | CRF02_AG   | CRF02_AG   | CRF02_AG          |
|                   | 2                | CRF02_AG   | CRF02_AG   |                   |
| MDC216            | 1                | CRF22_01A1 | CRF22_01A1 | CRF22_01A1        |
|                   | 2                | CRF22_01A1 | CRF22_01A1 |                   |
|                   | 3                | CRF22_01A1 | NA         |                   |
| MDC220            | 2                | NA         | CRF22_01A1 | <b>CRF22_01A1</b> |
| MDC221            | 1                | CRF02_AG   | NA         | CRF02_AG          |
|                   | 2                | CRF02_AG   | CRF02_AG   |                   |
| MDC222            | 1                | CRF02_AG   | NA         | CRF02_AG          |
|                   | 2                | CRF02_AG   | CRF02_AG   |                   |
| MDC223            | 1                | CRF02_AG   | CRF02_AG   | CRF02_AG          |
|                   | 3                | CRF02_AG   | CRF02_AG   |                   |
| MDC225            | 1                | CRF02_AG   | NA         | CRF02_AG          |
| MDC226            | 1                | CRF02_AG   | NA         | CRF02_AG          |
| MDC231            | 1                | CRF02_AG   | CRF02_AG   | CRF02_AG          |
|                   | 2                | CRF02_AG   | CRF02_AG   |                   |
| MDC232            | 1                | CRF02_AG   | CRF02_AG   | CRF02_AG          |
| MDC234            | 1                | CRF02_AG   | NA         | CRF02_AG          |
|                   | 2                | CRF02_AG   | NA         |                   |
| MDC235            | 1                | CRF01_AE   | NA         | CRF01_AE          |
|                   | 2                | CRF01_AE   | CRF01_AE   |                   |
| MDC237            | 1                | CRF11_cpx  | CRF11_cpx  | CRF11_cpx         |
|                   | 2                | CRF11_cpx  | CRF11_cpx  |                   |
| MDC240            | 1                | CRF02_AG   | CRF02_AG   | CRF02_AG          |
| MDC243            | 1                | CRF09_cpx  | CRF09_cpx  | CRF09_cpx         |
|                   | 2                | CRF09_cpx  | CRF09_cpx  |                   |
| MDC244            | 1                | CRF02_AG   | CRF02_AG   | CRF02_AG          |
| MDC251            | 1                | CRF02_AG   | NA         | CRF02_AG          |
| MDC265            | 1                | CRF02_AG   | CRF02_AG   | CRF02_AG          |
